# Supplementary material for: DHODH Inhibition Exerts Synergistic Therapeutic Effect with Cisplatin to Induce Ferroptosis in Cervical Cancer through Regulating mTOR Pathway
Source: MDPI journal article supplement (doi:10.3390/cancers15020546), 2023-01-16

Figure 1B, CaSki cells (DHODH; GAPDH)

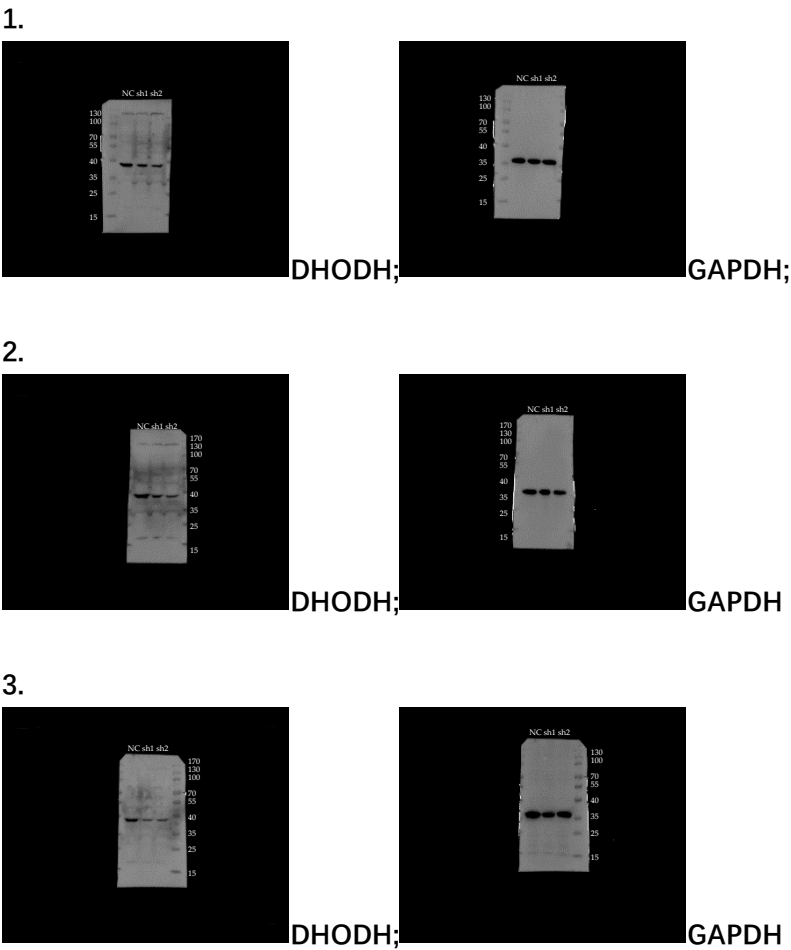

1.

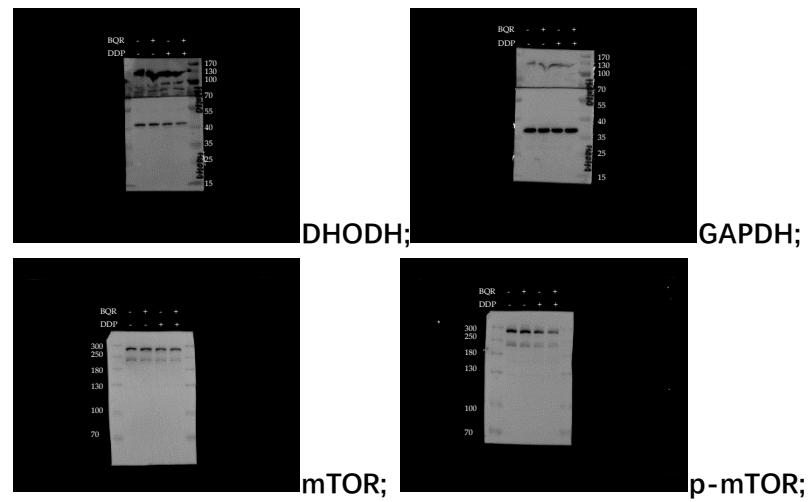

2.

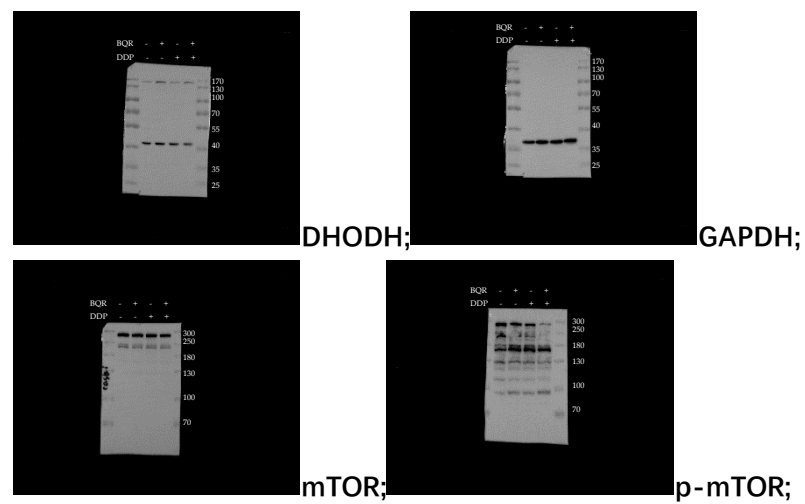

3.

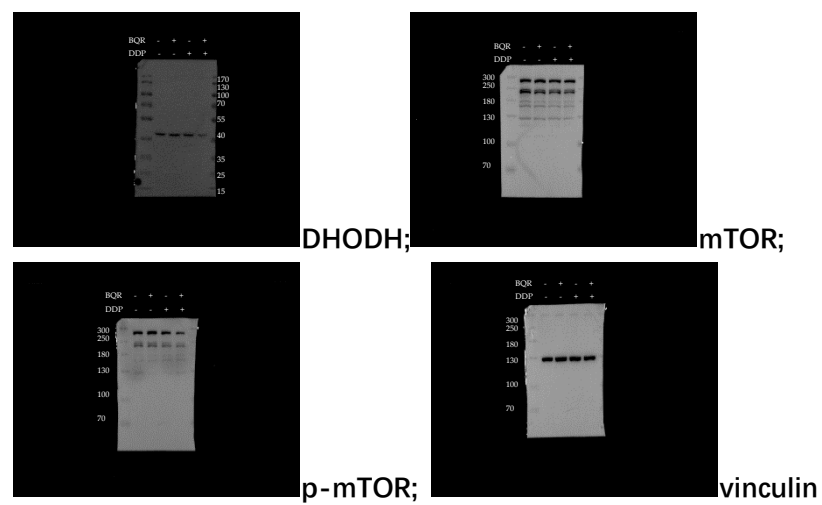

Figure 1B, HeLa cells (DHODH; GAPDH)

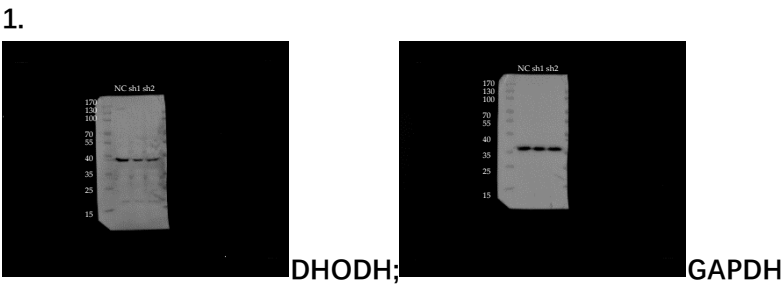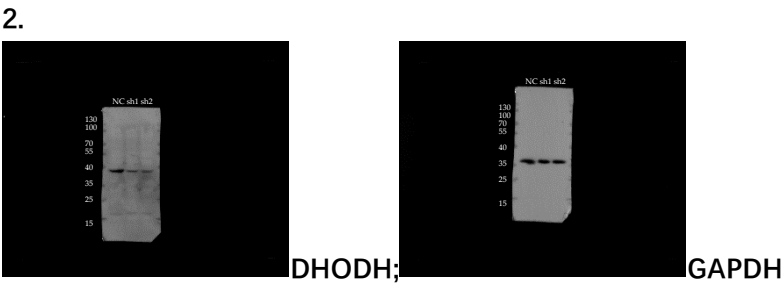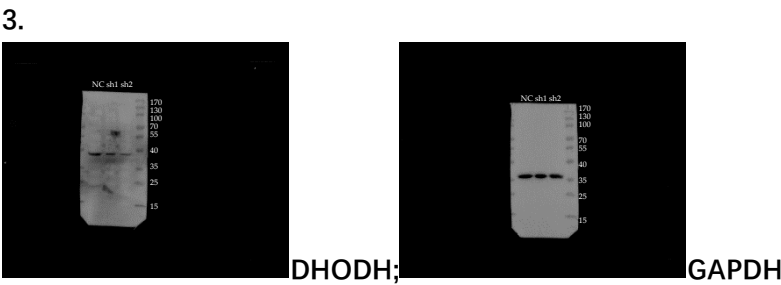

Figure 5A, HeLa cells (DHODH; mTOR; p-mTOR; GAPDH; Vinculin)

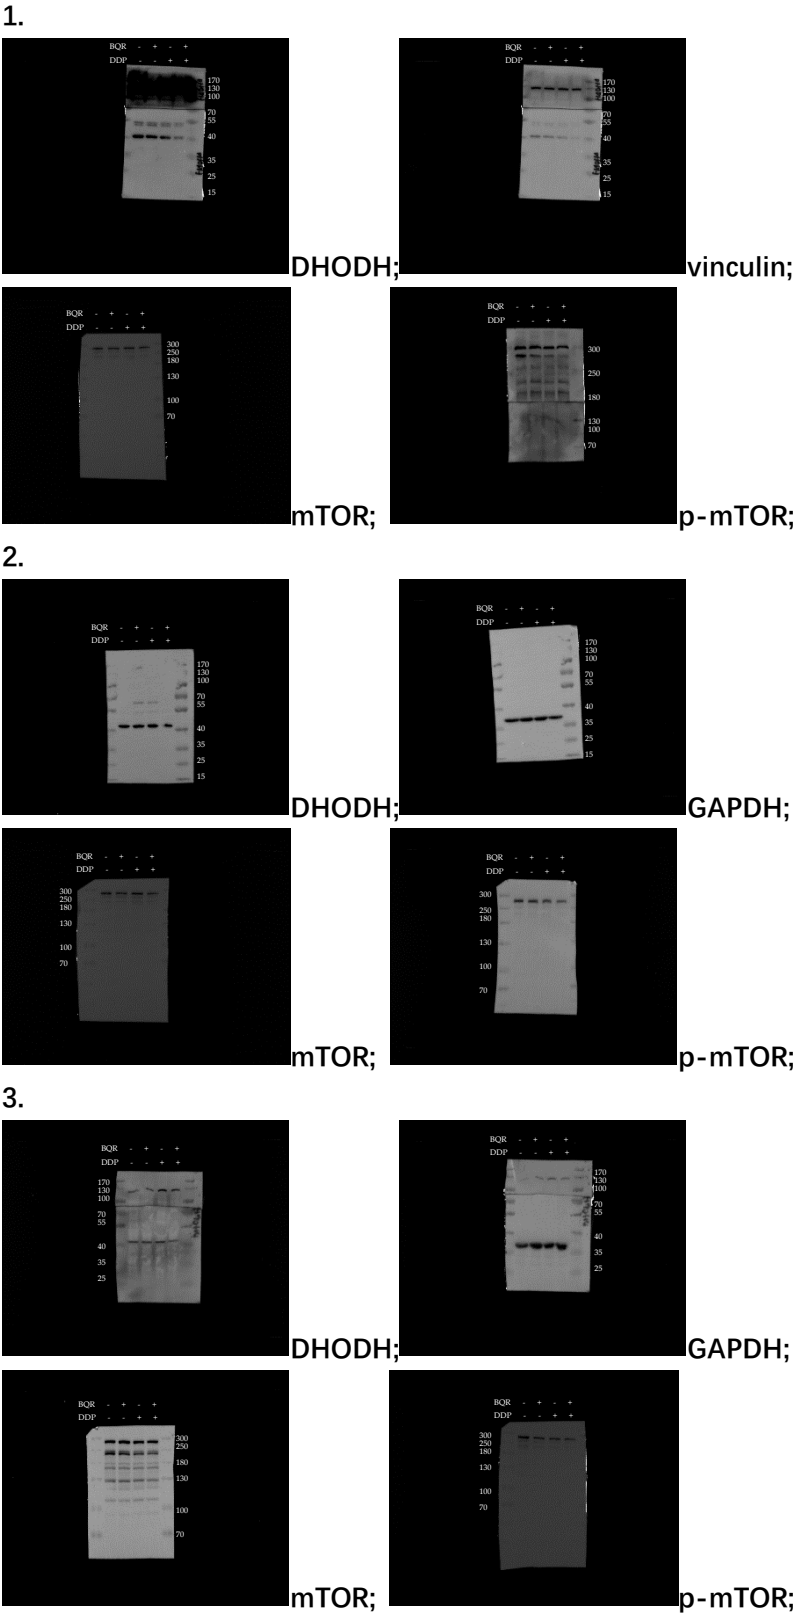

Supplement: s1 [file s1]
