# Supplementary material for: DHODH Inhibition Exerts Synergistic Therapeutic Effect with Cisplatin to Induce Ferroptosis in Cervical Cancer through Regulating mTOR Pathway
Source: MDPI journal article supplement (doi:10.3390/cancers15020546), 2023-01-16
Supplement: s1 [file s1]

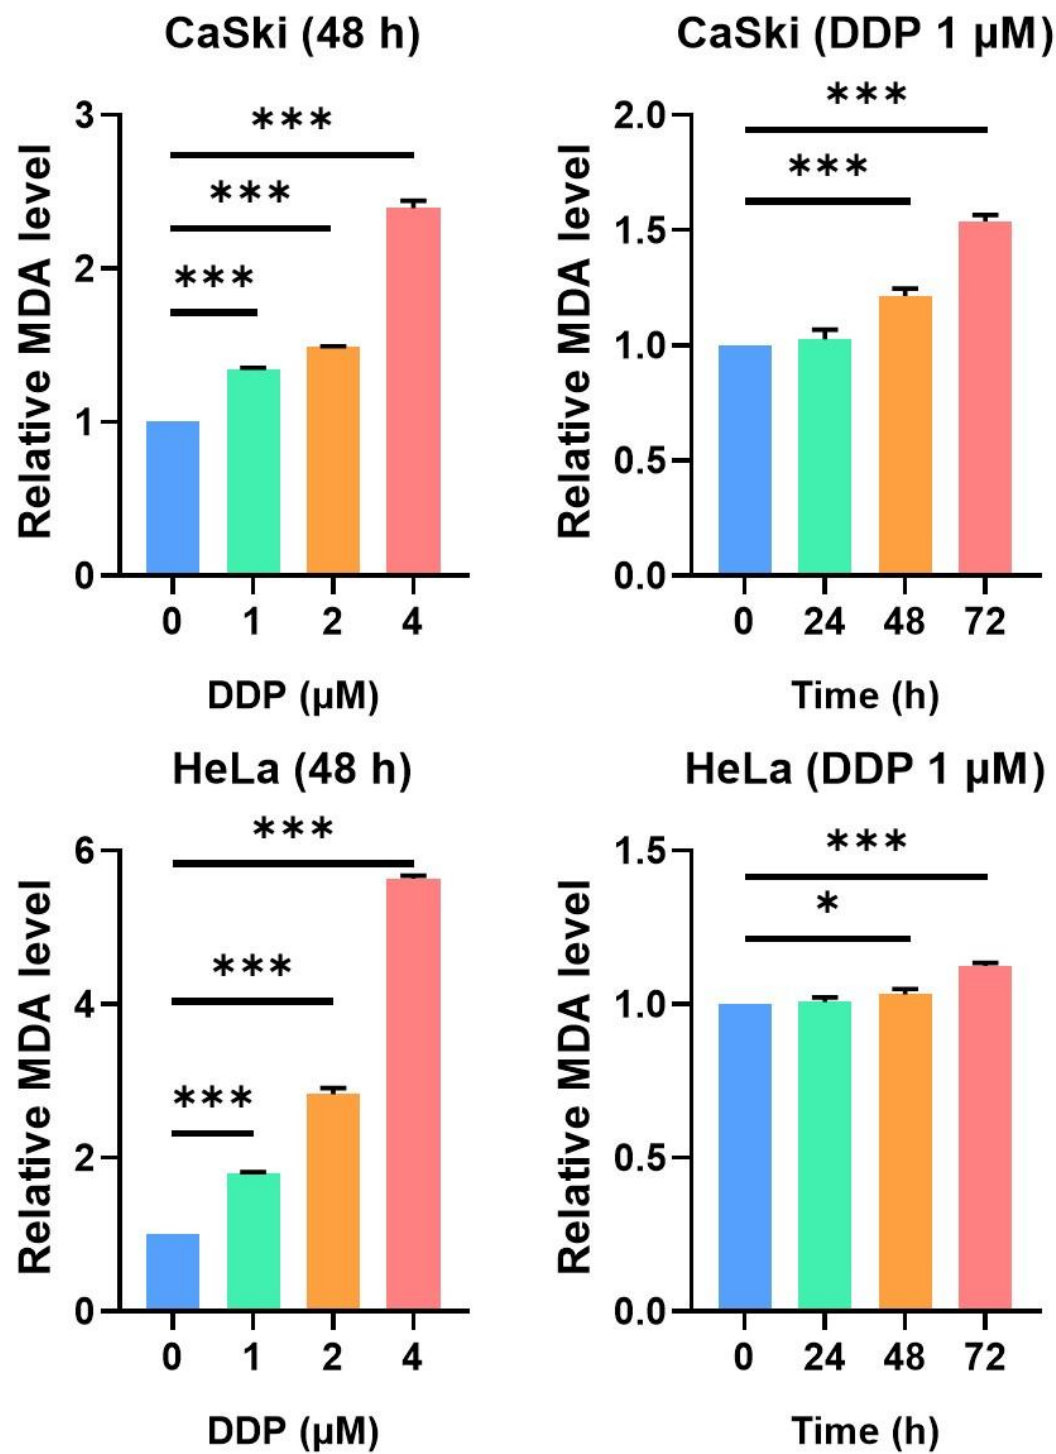

**Figure S1.** Cisplatin induces ferroptosis in a dose- and time-dependent way in cervical cancer cells.  
*\*p* < 0.05, *\*\*\*p* < 0.001 compared to the control group.
