# Supplementary material for: DHODH Inhibition Exerts Synergistic Therapeutic Effect with Cisplatin to Induce Ferroptosis in Cervical Cancer through Regulating mTOR Pathway
Source: Cancers (Basel). 2023 Jan 16;15(2):546. doi: 10.3390/cancers15020546 (PMC9856746; doi:10.3390/cancers15020546)
Supplement: Supplementary file 1 [file cancers-15-00546-s001.zip › Densitometry readings-intensity ratio.xlsx]

## Sheet: Figure 1B
CaSki				1
GAPDH1	159357	N	78378	0.491839		1	100
DHODH1	141784	sh1	44771	0.315769		0.642017	64.2017
DHODH2	158930	sh2	38966	0.245177		0.498491	49.8491
				2
GAPDH2	153701	N	102714	0.668272		1	100
DHODH1	127716	sh1	36864	0.28864		0.431921	43.1921
DHODH2	112640	sh2	28518	0.253178		0.378855	37.8855
				3
GAPDH3	251688	N	94592	0.37583		1	100
DHODH1	170368	sh1	32662	0.191714		0.510109	51.0109
DHODH2	225282	sh2	41518	0.184293		0.490363	49.0363
HeLa				1
GAPDH1	132376	N	79244	0.598628		1	100
DHODH1	112346	sh1	37871	0.337093		0.563108	56.3108
DHODH2	124882	sh2	53878	0.431431		0.7207	72.07
				2
GAPDH2	176357	N	77875	0.441576		1	100
DHODH1	134430	sh1	33694	0.250643		0.567611	56.7611
DHODH2	138542	sh2	39579	0.285682		0.646961	64.6961
				3
GAPDH3	95713	N	62353	0.651458		1	100
DHODH1	80977	sh1	41776	0.5159		0.791915	79.1915
DHODH2	71398	sh2	28390	0.39763		0.61037	61.037

## Sheet: Figure 5A-CaSki
DHODH1		DHODH2		DHODH3			DHODH				ratio
NC	36360.6	NC	22440.8	NC	30384		NC	1.02577	0.851346	1.05636	1	1	1	100	100	100
BQR	33460.1	BQR	30123.8	BQR	35094		BQR	0.936144	0.814565	1.01715	0.912629	0.956797	0.962888	91.2629	95.6797	96.2888
DDP	27221.7	DDP	24055.2	DDP	30869		DDP	0.837217	0.677098	0.90486	0.816187	0.795326	0.856586	81.6187	79.5326	85.6586
BQR+DDP	22677.3	BQR+DDP	18325.9	BQR+DDP	17061		BQR+DDP	0.63473	0.458104	0.529389	0.618786	0.538093	0.501147	61.8786	53.8093	50.1147
p-mTOR1		p-mTOR2		p-mTOR3			p-mTOR
NC	32886.5	NC	36773.8	NC	29126.2		NC	0.92776	1.3951	1.01263	1	1	1	100	100	100
BQR	34076.2	BQR	30037.1	BQR	32516.6		BQR	0.953382	0.812223	0.942451	1.02762	0.582195	0.9307	102.762	58.2195	93.07
DDP	23681.4	DDP	22794.9	DDP	25741		DDP	0.728335	0.641622	0.754543	0.785047	0.459909	0.745135	78.5047	45.9909	74.5135
BQR+DDP	16374.3	BQR+DDP	7344.85	BQR+DDP	14797.6		BQR+DDP	0.45831	0.183604	0.459157	0.493997	0.131606	0.453431	49.3997	13.1606	45.3431
mTOR1		mTOR2		mTOR3			mTOR
NC	28662	NC	34053.8	NC	32961.8		NC	0.808582	1.29192	1.14598	1	1	1	100	100	100
BQR	30976.3	BQR	30627.4	BQR	33459.7		BQR	0.866653	0.828185	0.969784	1.07182	0.641052	0.846249	107.182	64.1052	84.6249
DDP	24851.8	DDP	31668.4	DDP	30326.8		DDP	0.76433	0.891391	0.888967	0.945272	0.689976	0.775727	94.5272	68.9976	77.5727
BQR+DDP	22275.3	BQR+DDP	25697.8	BQR+DDP	28271.9		BQR+DDP	0.623479	0.642384	0.877256	0.771077	0.497234	0.765508	77.1077	49.7234	76.5508
GAPDH1		GAPDH2		vinculin3
NC	35447.2	NC	26359.1	NC	28763
BQR	35742.4	BQR	36981.4	BQR	34502.2
DDP	32514.4	DDP	35527	DDP	34114.7
BQR+DDP	35727.5	BQR+DDP	40003.7	BQR+DDP	32227.7

## Sheet: Figure 5A-HeLa
DHODH1		DHODH2		DHODH3			DHODH				ratio
NC	37927.8	NC	27809.7	NC	37593		NC	0.764488	0.387542	0.230136	1	1	1	100	100	100
BQR	30593	BQR	29459.9	BQR	42561		BQR	0.59984	0.372533	0.216855	0.784629	0.961269	0.942288	78.4629	96.1269	94.2288
DDP	21188.7	DDP	30264.9	DDP	45409		DDP	0.404495	0.382781	0.324315	0.529106	0.987713	1.40923	52.9106	98.7713	140.923
BQR+DDP	10563.7	BQR+DDP	15126.7	BQR+DDP	29449		BQR+DDP	0.22837	0.246323	0.177258	0.298723	0.635603	0.770232	29.8723	63.5603	77.0232
p-mTOR1		p-mTOR2		p-mTOR3			p-mTOR
NC	65163	NC	33153.5	NC	177168		NC	1.31345	0.462012	1.08458	1	1	1	100	100	100
BQR	41902	BQR	32957.3	BQR	128993		BQR	0.821576	0.416759	0.657239	0.625508	0.902053	0.605982	62.5508	90.2053	60.5982
DDP	30699	DDP	27361	DDP	115808		DDP	0.586049	0.346052	0.827111	0.44619	0.749011	0.762607	44.619	74.9011	76.2607
BQR+DDP	26093	BQR+DDP	19991.6	BQR+DDP	87495		BQR+DDP	0.564088	0.325543	0.526647	0.429469	0.704619	0.485575	42.9469	70.4619	48.5575
mTOR1		mTOR2		mTOR3			mTOR
NC	28610.1	NC	32039.1	NC	32051.1		NC	0.576677	0.446482	0.19621	1	1	1	100	100	100
BQR	28540.9	BQR	31217.1	BQR	37511.1		BQR	0.559604	0.394753	0.191125	0.970394	0.88414	0.974083	97.0394	88.414	97.4083
DDP	29636.3	DDP	34640.9	DDP	30421.9		DDP	0.565762	0.438126	0.217276	0.981071	0.981285	1.10736	98.1071	98.1285	110.736
BQR+DDP	26036.6	BQR+DDP	25248.9	BQR+DDP	29715		BQR+DDP	0.562868	0.411154	0.17886	0.976053	0.920874	0.911572	97.6053	92.0874	91.1572
vinculin1		GAPDH2		GAPDH3
NC	49612	NC	71759	NC	163351
BQR	51002	BQR	79080	BQR	196265
DDP	52383	DDP	79066	DDP	140015
BQR+DDP	46257	BQR+DDP	61410	BQR+DDP	166136
